# Supplementary figures and images for: Super resolution microscopy reveals DHA-dependent alterations in glioblastoma membrane remodelling and cell migration
Source: Royal Society of Chemistry journal article supplement (doi:10.1039/d1nr02128a), 2021-01-01

U87 cells

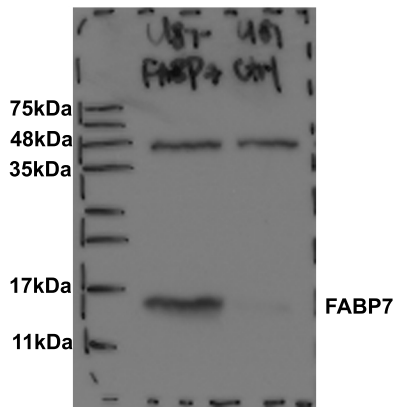

U251 and ED501N cells

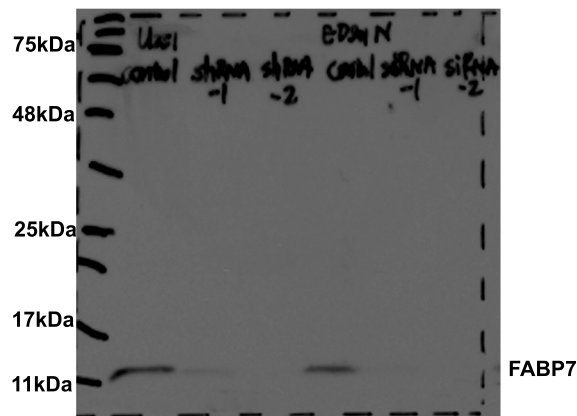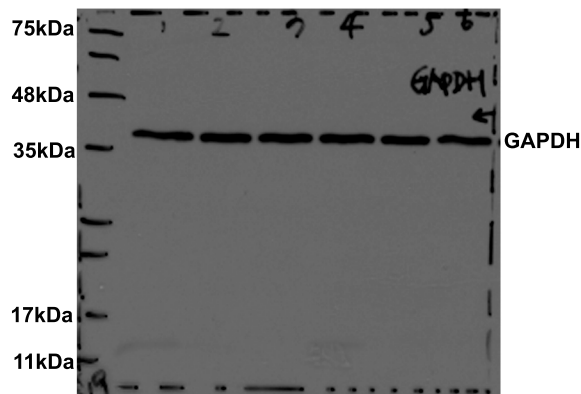

**Fig.S8 Western blot source data**

U251 cells

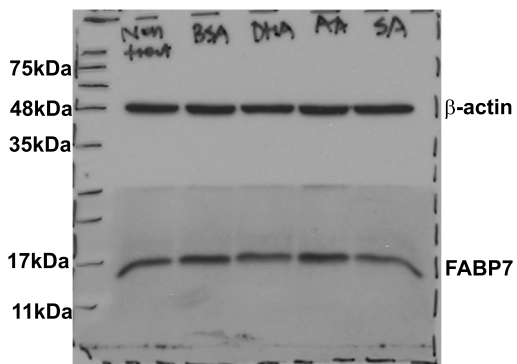

ED501N cells

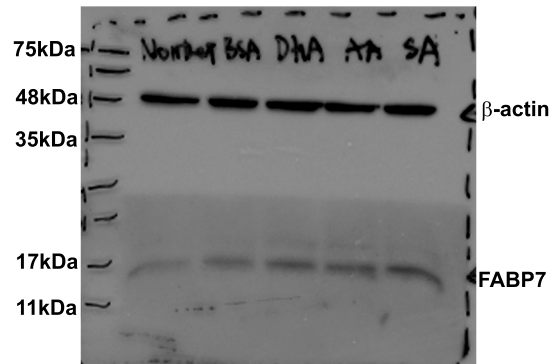

A4-004N cells

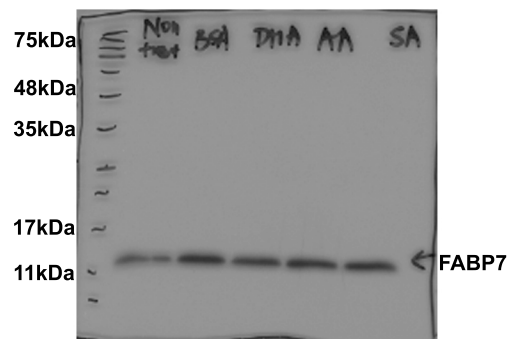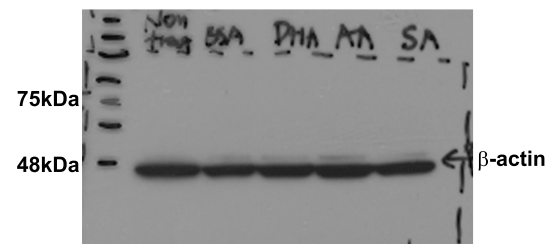

Supplement: d1nr02128a2.pdf [file d1nr02128a2.pdf]
